# Supplementary material for: Structure and function of outer dynein arm intermediate and light chain complex
Source: PubMed Central journal article supplement — Mol Biol Cell. 2016 Apr 1;27(7):1051–9. doi: 10.1091/mbc.E15-10-0723 (PMC4814214; doi:10.1091/mbc.e15-10-0723), 2016-04-01
Supplement: supp_E15-10-0723v1_CombinedSupMats.pdf [file supp_E15-10-0723v1_CombinedSupMats.pdf]

# Supplemental Materials

*Molecular Biology of the Cell*

Oda et al.

**A**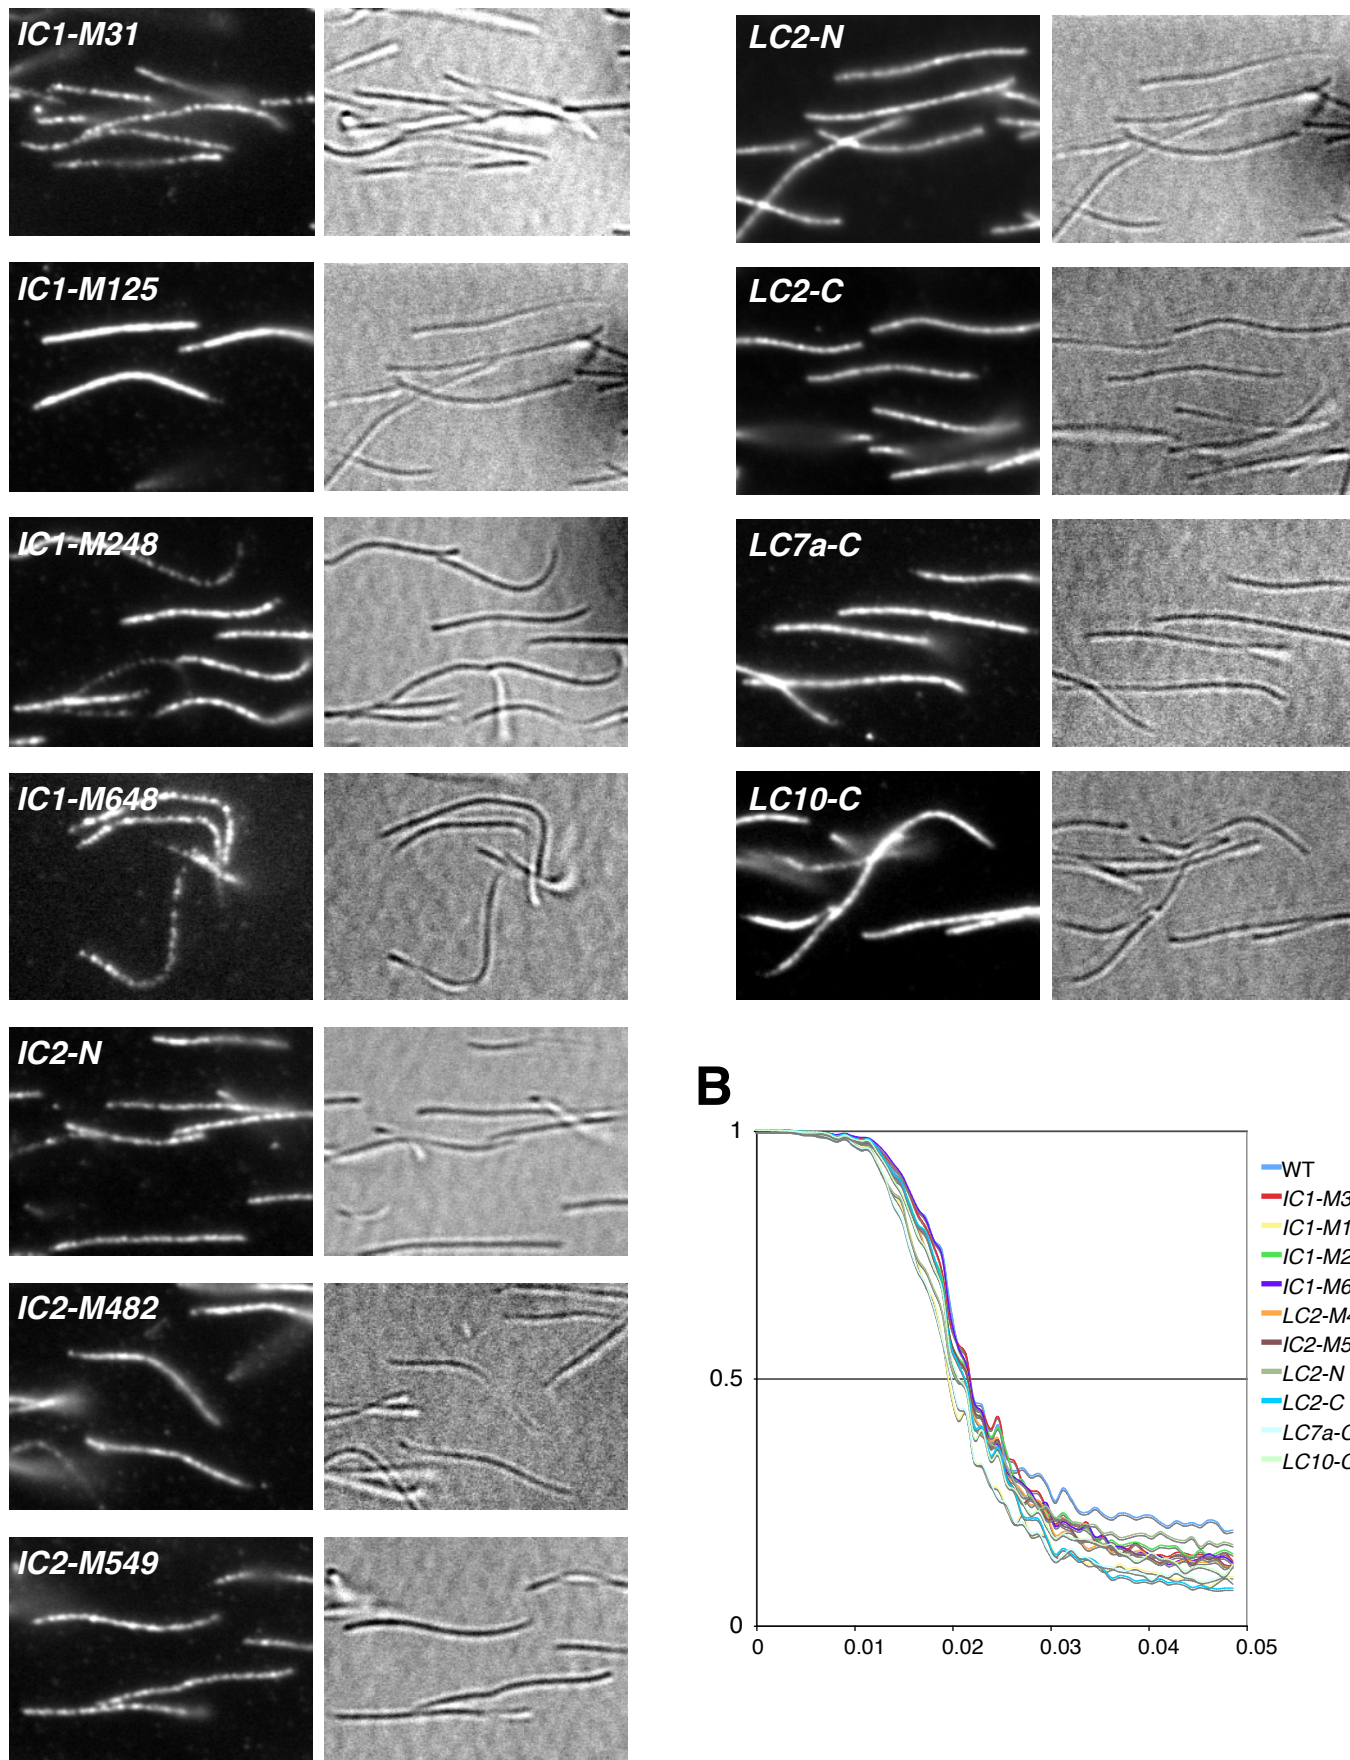**B**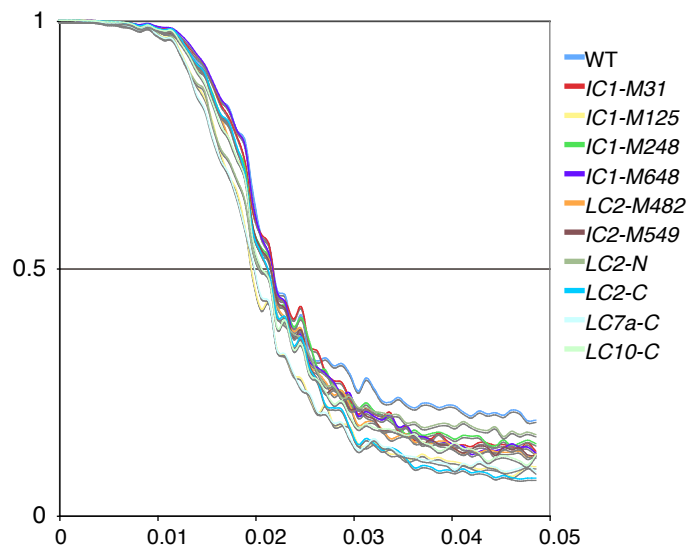**Figure S1**

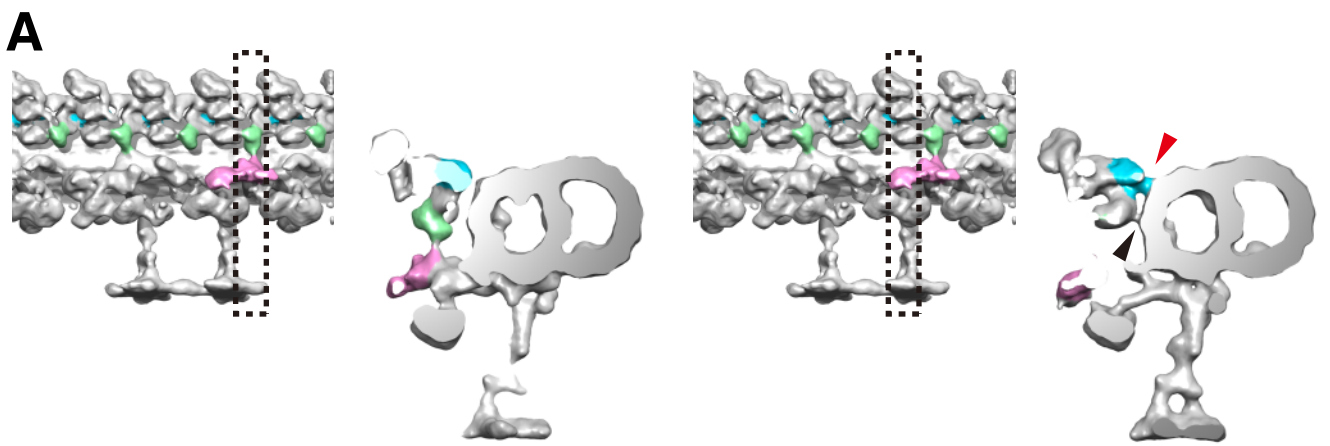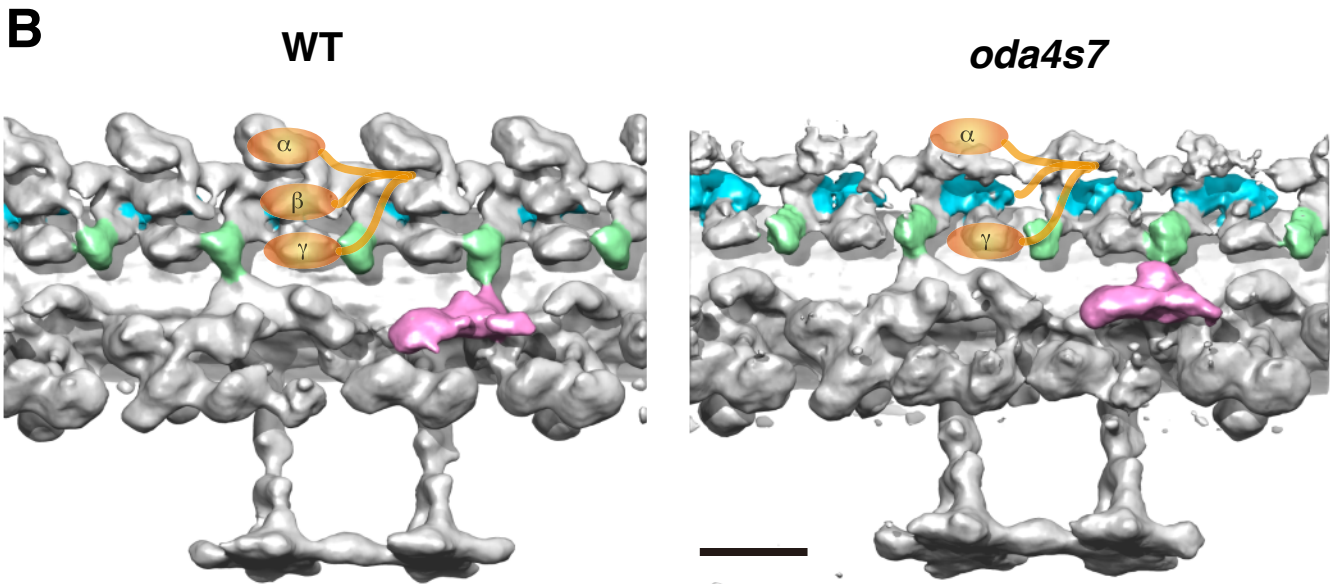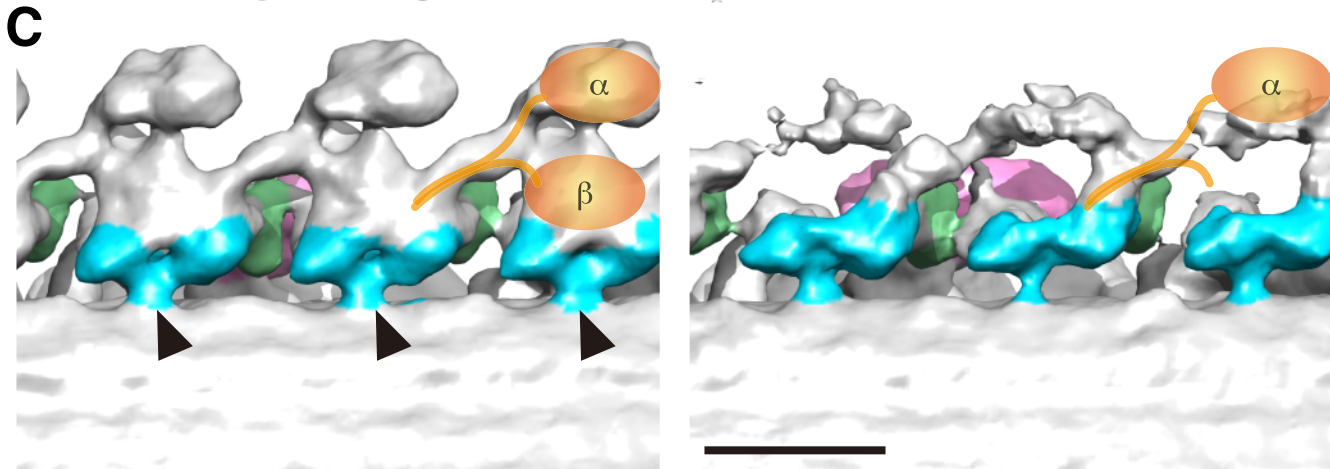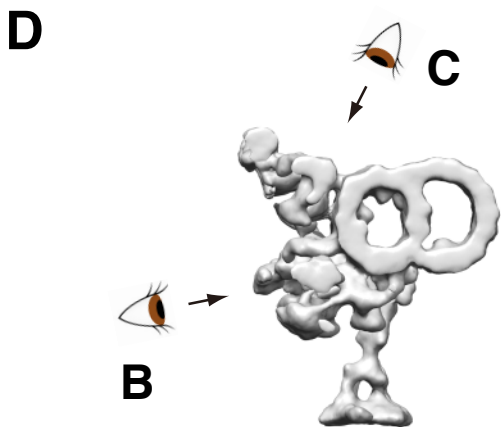

**Figure S2**

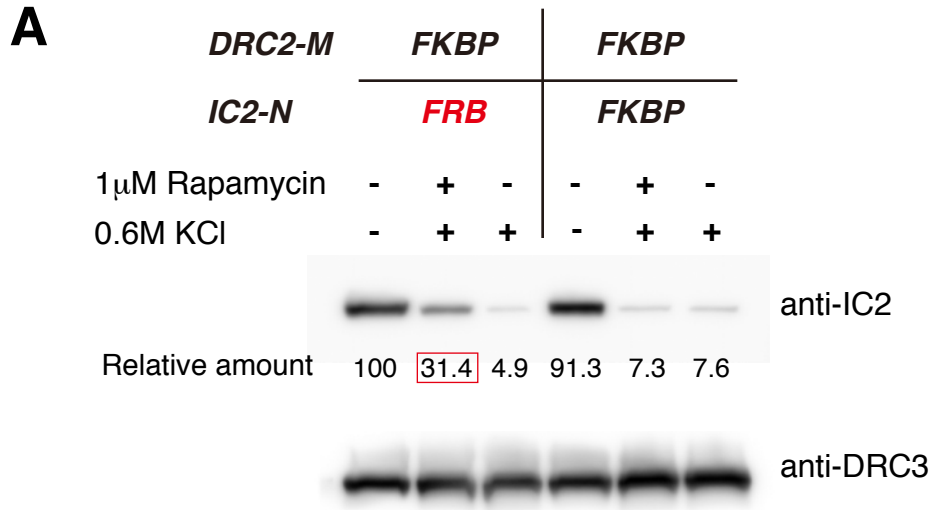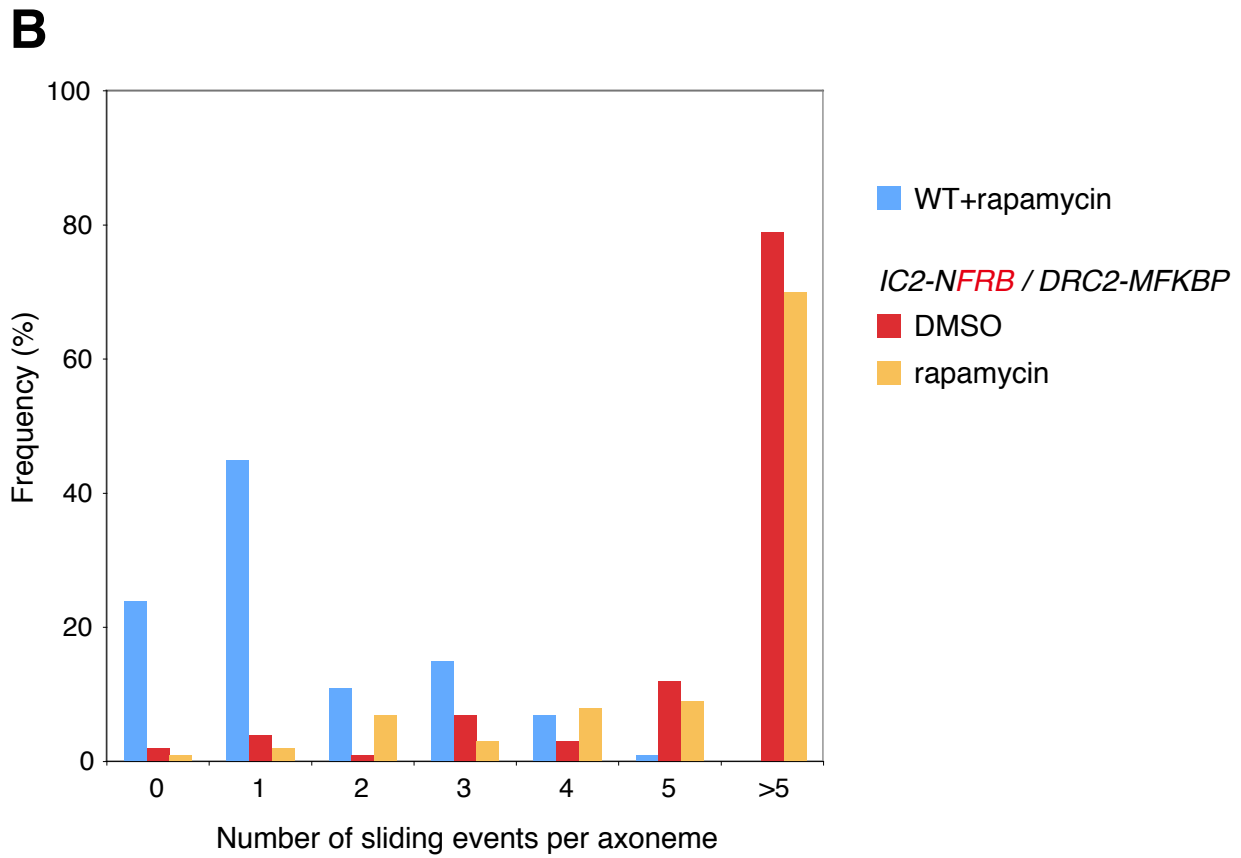

**Figure S3**

*Figure S1*

Characterization of *IC-BCCP* and *LC-BCCP* mutants. (A) Immunofluorescence images of BCCP-tagged axonemes. Biotinylation of BCCP tags were confirmed by streptavidin-Alexa 546 staining (left). Right: DIC images. (B) Fourier shell correlation curves of averaged tomograms used in this study. Intersection between each curve and horizontal line at 0.5 was taken as the effective resolution. Effective resolution of each structure was 4.5~ 5.0 nm. WT:wild-type.

*Figure S2*

3D structure of *oda4-s7* DMT. (A) Slabs of tomograms, showing DMT-attachment sites. (left) There is not apparent connection between ODA-Beak (green) and DMT. (right) There are two possible DMT-attachment sites projecting from  $\gamma$  HC (black arrowhead) and the outermost region of ODA (blue, red arrowhead). (B, C) DMT structure of *oda4s7* mutant. Diagrams in orange indicate approximate positions of the HCs. Green: ODA-Beak; pink:

N-DRC; blue: DMT-binding complex. Arrowheads indicate DMT-binding site of ODA.

Bars = 20 nm. (D) Direction of views in B and C.

*Figure S3*

Additional data for Figure 3 and 4. (A) Related to Figure 3D and 3E. Immunoblots of

axonemal proteins with and without rapamycin-treatment and KCl-extraction. With

rapamycin-treatment, about 30% of ODA remained attached to axonemes after

KCl-extraction. (B) Related to Figure 4D. Histograms of the sliding events per axoneme.

Sliding disintegration was enhanced regardless of rapamycin-treatment.
